1  
2  
3  
4  
5  
6  
7  
8  
9  
10  
11  
12  
13  
14  
15  
16  
17  
18  
19  
20  
21  
22  
23  
24

Relative toxicity of selected herbicides and household chemicals to earthworms

Elizabeth G. Mosqueda<sup>1¶</sup>, Albert T. Adjewor<sup>2¶</sup>, Andrew R. Kniss<sup>2¶\*</sup>

<sup>1</sup>Department of Biology and Chemistry, California State University, Monterey Bay, Seaside, California, States of America

<sup>2</sup>Department of Plant Sciences, University of Wyoming, Laramie, Wyoming, United States of America

\*Corresponding author

Email: [akniss@uwyo.edu](mailto:akniss@uwyo.edu) (AK)

¶These authors contributed equally to this work.

## 1 **Abstract**

2 Agrochemicals are an important component of agricultural production systems. There are  
3 increasing concerns about the effect of agrochemicals on soil biota and ecosystems. We evaluated  
4 the short-term, acute effects of commonly used herbicides and household chemicals on earthworms  
5 (*Lumbricus terrestris* L.). The experiment was conducted on 19 Feb. 2018 (Exp. 1) and repeated  
6 on 27 Jun. 2018 (Exp. 2). In both experiments, there were 13 treatments comprising 10 herbicides:  
7 atrazine (Aatrex), nicosulfuron (Accent Q), dicamba (Clarity), s-metolachlor (Dual Magnum),  
8 paraquat (Gramoxone), pendimethalin (Prowl H<sub>2</sub>O), glyphosate (Roundup PowerMax), and  
9 clethodim (SelectMax) caprylic acid plus capric acid (Suppress EC), and pelargonic acid (Scythe);  
10 one common spray adjuvant (nonionic surfactant, Preference), a combination of two household  
11 chemicals commonly promoted as herbicide substitutes (vinegar plus dish soap), and a non-treated  
12 control. All treatments were applied to earthworms at field use rates as recommended on the  
13 product label, or, in the case of vinegar plus soap, at a concentration we found somewhere on the  
14 internet. Treatments were arranged in a completely randomized design with 10 replicates. Worms  
15 sprayed with Aatrex, Accent, Clarity, Dual Magnum, SelectMax, and Suppress EC were at greater  
16 risk of mortality compared to the non-treated control in Expt. 1, but in Expt. 2, chemical treatments  
17 did not increase the risk of worm mortality. Average time to mortality ranged from 12 to 21 days  
18 and 17 to 24 days in Expts. 1 and 2, respectively. The herbicides evaluated in this study present a  
19 low risk of acute toxicity to earthworms when applied at recommended rates.

## 20 **Introduction**

21 The presence of large invertebrates such as *Lumbricus terrestris* L., the common earthworm,  
22 has been extensively documented to improve soil structure and health by increasing soil aeration  
23 and drainage, and by breaking down organic matter [1-3]. In agroecosystems, these large

24 invertebrates have been shown to be exceptionally beneficial to crop health by creating more  
25 conducive environments for crop growth [4-7]. The beneficial effects of worms in agroecosystems  
26 have not gone unnoticed by growers who have made conscious decisions to adopt practices that  
27 create more favorable environments for worm populations, as exhibited by the practices of  
28 conservation agriculture [8].

29 One main principle of conservation agriculture is conservation tillage. Conservation tillage is  
30 comprised of management practices that aim to decrease soil erosion, preserve soil structure, and  
31 increase moisture storage. Conservation tillage practices minimize or completely eliminate any  
32 processes which intensely disturb soil [9]. Studies have shown that tillage decreases the overall  
33 abundance of earthworms, therefore conservation tillage can positively influence worm  
34 populations [10-12]. However, conservation tillage can adversely impact other aspects of cropping  
35 systems, such as weed density. Tillage practices are some of the most effective forms of weed  
36 control. Through inversion and/or mixing of the soil through conventional tillage practices, weeds  
37 above ground can be uprooted and weed seed emergence can be reduced by burying them deep in  
38 the soil [13, 14]. Thus, in the absence of tillage, there is heavy reliance on other weed control tools  
39 such as herbicides.

40 Herbicides are one of the most effective tools available to farmers to help control weeds in  
41 crops. Herbicide use has dramatically increased since the rise of chemical weed control in the late  
42 1940's [15] and is a prominent tool to control weeds in agroecosystems where conservation tillage  
43 has been adopted [16, 17]. Concerns over adverse effects to ecosystems caused by extensive use  
44 of agrochemicals, especially herbicides, has become a major focus for environmentalists and  
45 growers wishing to implement sustainable cropping practices[18].

46 Several studies have quantified the relative toxicity of agrochemicals on earthworms through  
47 various laboratory studies and models [18-20]. Hattab, Boughattas [30] demonstrated that 7 to 14  
48 days of exposure to 2,4-dichlorophenoxyacetic acid (24-D), an auxin mimic herbicide, did not  
49 result in mortality of the compost earthworm (*Eisenia andrei* Bouché). In a related study, Roberts  
50 and Dorrough (21) reported that 2,4-D phenol is among the most toxic chemicals to *E. fetida*.  
51 Acetochlor, a soil-applied preemergence herbicide, had no long-term effect on *E. fetida* when  
52 applied at field use rate [18]. Although previous studies evaluated the effects of a wide range of  
53 herbicides on worms, most studies either evaluated only the active ingredient (instead of the  
54 commercial formulation) or used herbicides rates higher than the recommended field use rate [18,  
55 22-25]. The objective of this study was to directly compare the direct, acute toxicity of commercial  
56 formulations of commonly used herbicides in earthworms.

## 57 **Materials and methods**

58 Laboratory experiments were conducted in 2018 at the University of Wyoming Laramie  
59 Research and Extension Center, Laramie WY to evaluate the toxicity of herbicides and  
60 household chemicals to worms. Large earthworms measuring ~13 cm in length were purchased  
61 from a local fishing store (West Laramie Fly Shop, Laramie WY) on 19 Feb. 2018 (Exp. 1) and  
62 27 Jun. 2018 (Exp. 2), a few hours before spraying. In both experiments, worms from each  
63 packaged container (24 worms/container) were poured into a large container and gently shaken  
64 and stirred to ensure thorough mixing. Worms were then selected one at a time and placed in  
65 transparent plastic seedboxes measuring 10 × 10 cm.

66 In both experiments, field use rates of nine conventional agriculture herbicides, one  
67 organic herbicide, one spray adjuvant, and a combination of two household chemicals were used  
68 (Table 1). A non-treated control was also included.

69 **Table 1. Chemicals and rates applied to worms.**

| <b>Chemical</b>                               | <b>Common name</b>            | <b>Product application rate</b> |
|-----------------------------------------------|-------------------------------|---------------------------------|
| <b>Conventional herbicide</b>                 |                               |                                 |
| Aatrex <sup>a</sup>                           | Atrazine                      | 4677 mL ha <sup>-1</sup>        |
| Accent <sup>b</sup>                           | nicosulfuron                  | 47 g ha <sup>-1</sup>           |
| Clarity <sup>c</sup>                          | dicamba                       | 877 mL ha <sup>-1</sup>         |
| Dual magnum <sup>a</sup>                      | s-metolachlor                 | 1754 mL ha <sup>-1</sup>        |
| Gramoxone <sup>a</sup>                        | paraquat                      | 2631 mL ha <sup>-1</sup>        |
| Prowl H <sub>2</sub> O <sup>c</sup>           | pendimethalin                 | 2338 mL ha <sup>-1</sup>        |
| Roundup PowerMax <sup>d</sup>                 | glyphosate                    | 1608 mL ha <sup>-1</sup>        |
| SelectMax <sup>e</sup>                        | clethodim                     | 877 mL ha <sup>-1</sup>         |
| Scythe <sup>f</sup>                           | pelargonic acid               | 3% (v/v)                        |
| <b>Adjuvant</b>                               |                               |                                 |
| Preference <sup>g</sup>                       | nonionic surfactant           | 0.25 % (v/v)                    |
| <b>Organic herbicide</b>                      |                               |                                 |
| Suppress EC <sup>h</sup>                      | caprylic acid and capric acid | 3 % (v/v)                       |
| <b>Household chemical</b>                     |                               |                                 |
| Vinegar <sup>j</sup> + dish soap <sup>k</sup> | -                             | 100 + 0.0078 % (v/v)            |

70 <sup>a</sup>Aatrex, Syngenta, Greensboro, North Carolina, United States

71 <sup>b</sup>Dupont, Wilmington, DE, United States

72 <sup>c</sup>BASF Corp., Durham, NC, United States

73 <sup>d</sup>Monsanto Company, St. Louis, MO, United States

74 <sup>e</sup>Valent Corp., Walnut Creek, CA, United States

75 <sup>f</sup>Mycogen Corp., San Diego CA, United States

76 <sup>g</sup>WinField Solutions, St. Paul, MN, United States

77 <sup>h</sup>Westbridge Agricultural Products, Vista, CA, United States

78 <sup>j</sup>Kraft Heinz Company, Chicago, IL, United States

79 <sup>k</sup>Procter & Gamble, Cincinnati, OH, United States

80

81 Each chemical treatment was replicated 10 times in a completely randomized design in  
 82 both experiments. Worms were sprayed directly in transparent plastic seedboxes using a single-  
 83 nozzle spray chamber calibrated to deliver 187 L/ha of total spray volume, and then immediately  
 84 covered in 150 mL of moist potting media (BM Custom Blend, Berger, Saint-Modeste, Quebec,

85 Canada) and loosely placing the lid of the seed box to prevent worm escape and ensure oxygen  
86 entered the box. Seedboxes containing the treated worms were transferred to a dark room and  
87 kept at room temperature.

88 Mortality was recorded as a binary variable by assigning 0 if the worm was alive and 1 if  
89 the worm was dead. Worms were considered dead when they did not respond to a gentle poke of  
90 the finger [26]. Mortality was assessed regularly until all worms including the non-treated  
91 controls were dead. This corresponded to 45 and 51 days after treatment (DAT) in Expt. 1 and  
92 Expt. 2, respectively.

93 Survival analysis was used to quantify the acute toxicity of each treatment to earthworms.  
94 A Cox proportional hazards model (Eq. 1) was used to estimate the risk of mortality. The model  
95 was of the form:

$$96 \lambda(t,x) = \lambda_0(t)\exp(\beta^T x) \quad (1)$$

97 Where  $\lambda(t,x)$  is the hazard rate of each chemical treatment ( $x$ ) at a given time ( $t$ ),  $(\beta^T x)$   
98 is the regression function of each treatment, and  $\lambda_0(t)$  is the time-dependent part of the model  
99 [27]. The regression function  $(\beta^T x)$  is similar to the coefficients in multiple linear regression and  
100 thus, the greater the coefficient (hazard ratio), the greater the risk of mortality. The proportional  
101 hazards regression was performed in the R statistical language (v 3.5.1) using the ‘survival’  
102 package (v 2.38) [28-30].

## 103 **Results and discussion**

104 Cox proportional hazards ratios indicated that worms sprayed with Aatrex, Accent, Clarity, Dual  
105 Magnum, SelectMax, and Suppress were at greater risk of mortality compared to the non-treated  
106 control in Expt. 1 (Fig 1). However, variability in hazard ratios were also greater in these

107 treatments (Fig 1). In Expt. 2, chemical treatments did not increase the risk of worm mortality  
108 compared to the non-treated control. In fact, the application of Preference and Scythe appeared to  
109 reduce the risk of mortality compared to the non-treated control in Expt. 2 (Fig 1). This shows that  
110 in most cases, worms died from starvation rather than the direct effects of chemical treatments.

111 **Fig 1. Risk of worm (*Lumbricus terrestris*) mortality (Cox proportional hazards ratio)**  
112 **following application of conventional herbicides (Aatrex, Accent, Clarity, Dual magnum,**  
113 **Gramoxone, Prowl H<sub>2</sub>O, Roundup PowerMax, SelectMax, and Scythe), an organic herbicide**  
114 **(Suppress EC), an adjuvant (Preference), and household chemicals (vinegar and soap) on 19**  
115 **Feb. 2018 (A) and 27 Jun. 2018 (B), Laramie WY. Bars indicate 95% confidence interval.**  
116 Dashed vertical line indicates hazard coefficient of the non-treated control. Bars that overlap the  
117 dashed line are not different from the non-treated control at the 0.05 probability level

118

119 Average time to earthworm mortality ranged from 12 to 21 days and 17 to 24 days in Expts. 1 and  
120 2, respectively (Fig 2). This indicates that the risk of acute mortality from direct exposure to these  
121 chemicals is low when applied at recommended rates.

122

123 **Fig 2. Worm (*Lumbricus terrestris*) mortality distribution following application of**  
124 **conventional herbicides (Aatrex, Accent, Clarity, Dual magnum, Gramoxone, Prowl H<sub>2</sub>O,**  
125 **Roundup PowerMax, SelectMax, and Scythe), an organic herbicide (Suppress EC), an**  
126 **adjuvant (Preference), and household chemicals (vinegar and soap) compared to the non-**  
127 **treated control (Control) on 19 Feb. 2018 (A) and 27 Jun. 2018 (B), Laramie WY. Dashed**  
128 vertical lines indicate mean time (days) to mortality.

129

130 Roberts and Dorough (31) stated that the active ingredient in gramoxone is only moderately toxic  
131 to earthworms. Similarly, glyphosate (the active ingredient in Roundup PowerMax) has low to  
132 negligible toxicity in *E. fetida* [32]. Hattab, Boughattas (33) demonstrated that 7 to 14 days  
133 exposure to 2,4-dichlorophenoxyacetic acid (24-D), an auxin herbicide with similar activity as  
134 dicamba, did not result in mortality of the compost earthworm (*E. andrei*). However, exposure to  
135 2,4-D herbicide reduced the growth of the earthworm [33]. On the contrary, Roberts and Dorough  
136 (21) reported that 2,4-D phenol is among the most toxic chemicals to the earthworm *E. fetida*.  
137 Butler and Verrell (22) concluded in a study that Ortho Weed Be Gon, the commercial formulation  
138 of mecoprop, 2,4-D, and dicamba mixture was not toxic to the earthworm *E. fetida* and could even  
139 reduce the toxicity of organophosphate insecticides to worms.

140 Exposure of annelid worms (*L. variegatus*) to high concentrations of diuron, a herbicide  
141 that inhibits photosynthesis, did not affect *L. variegatus* reproduction and no mortality was  
142 recorded 10 days after application [34]. Nebeker and Schuytema (34) concluded that although  
143 diuron reduced the weight of *L. variegatus*, field use rates of diuron would do little harm to worms.  
144 Similarly, exposure of the aquatic worm (*Tubifex tubifex*) to isoproturon herbicide, a herbicide that  
145 inhibits photosynthesis did not result in mortality 7 days after treatment [35]. However, the growth  
146 rate of *T. tubifex* reduced with increased rates of isoproturon [35].

147 It is important to state that the experimental procedure we employed assumed a worst-case  
148 scenario where herbicides are sprayed directly on worms and worms are confined to the toxic  
149 environment for the rest of their lives. This is unlikely under field conditions because worms may  
150 exhibit an avoidance response when exposed to toxic chemicals by moving into uncontaminated  
151 soils if accessible [22, 32]. However, similar methods have been used in the past to evaluate worst-



152 case scenarios. For example, Bruhl [36] sprayed juvenile frogs (*Rana temporaria*) directly with  
153 terrestrial pesticides using methods similar to ours and reported mortality “within one hour” of  
154 application. The authors of that study went so far as to suggest pesticide exposure may be an  
155 underestimated cause of global amphibian decline. Our results, though, suggest that most of the  
156 herbicides and household products evaluated here are unlikely to cause such dramatic acute effects  
157 in earthworms if used as directed.

158         These herbicides, when applied at the recommended field use rates are not likely to cause  
159 acute mortality in earthworms. We did not evaluate other aspects of toxicity (such as activity or  
160 reproduction) in this study, but evidence from previous studies suggest that the effect on  
161 reproduction of *L. terrestris* is also unlikely [34]. Chemical toxicity depends on the worm species.  
162 For example, *Eisenia foetida* is less sensitive to chemicals compared to *L. rubellus* [21]. Thus, the  
163 species of worm used in the study might have influenced the results.

## 164 **Conclusions**

165 Worms sprayed with Aatrex, Accent, Clarity, Dual magnum, SelectMax, and Suppress were at  
166 greater risk of mortality compared to the non-treated control in Expt. 1. In Expt. 2, chemical  
167 treatments did not increase the risk of worm mortality. Average time to mortality ranged from 12  
168 to 21 days and 17 to 24 days in Expts. 1 and 2, respectively. Herbicides present low risk of acute  
169 mortality to worms when applied at recommended field use rates.

## References

170  
171  
172  
173  
174  
175  
176  
177  
178  
179  
180  
181  
182  
183  
184  
185  
186  
187  
188  
189  
190  
191  
192  
193

1. Blanchart E, Albrecht A, Alegre J, Duboisset A, Gilot C, Pashanasi B, et al. Effects of earthworms on soil structure and physical properties. *Earthworm management in tropical agroecosystems*. 1999;5:149-71.
2. Bronick CJ, Lal R. Soil structure and management: a review. *Geoderma*. 2005;124(1-2):3-22.
3. Amezketta E. Soil aggregate stability: a review. *Journal of sustainable agriculture*. 1999;14(2-3):83-151.
4. Brown GG, Edwards CA, Brussaard L. How earthworms affect plant growth: burrowing into the mechanisms. *Earthworm ecology*. 2004;2:13-49.
5. Brussaard L. Soil fauna, guilds, functional groups and ecosystem processes. *Applied soil ecology*. 1998;9(1-3):123-35.
6. Verhoef H, Brussaard L. Decomposition and nitrogen mineralization in natural and agroecosystems: the contribution of soil animals. *Biogeochemistry*. 1990;11(3):175.
7. Hendrix PF, Parmelee RW, Crossley D, Coleman DC, Odum EP, Groffman PM. Detritus food webs in conventional and no-tillage agroecosystems. *Bioscience*. 1986;36(6):374-80.
8. Lahmar R. Adoption of conservation agriculture in Europe: lessons of the KASSA project. *Land use policy*. 2010;27(1):4-10.
9. Derpsch R. Conservation tillage, no-tillage and related technologies. *Conservation agriculture*: Springer; 2003. p. 181-90.
10. Rovira A, Smettem K, Lee K. Effect of rotation and conservation tillage of earthworms in a red-brown earth under wheat. *Australian Journal of Agricultural Research*. 1987;38(5):829-34.

- 194 11. House GJ, Parmelee RW. Comparison of soil arthropods and earthworms from conventional  
195 and no-tillage agroecosystems. *Soil and Tillage Research*. 1985;5(4):351-60.
- 196 12. Wardle DA. Impacts of disturbance on detritus food webs in agro-ecosystems of contrasting  
197 tillage and weed management practices. *Advances in ecological research*. 26:  
198 Elsevier; 1995. p. 105-85.
- 199 13. Gunsolus JL. Mechanical and cultural weed control in corn and soybeans. *American Journal*  
200 *of Alternative Agriculture*. 1990;5(3):114-9.
- 201 14. Bond W. Non-chemical weed management. *Weed Management Handbook*. 2002:296-7.
- 202 15. Timmons F. A history of weed control in the United States and Canada. *Weed Sci*.  
203 1970;18(2):294-307.
- 204 16. Derksen DA, Lafond GP, Thomas AG, Loepky HA, Swanton CJ. Impact of agronomic  
205 practices on weed communities: tillage systems. *Weed Sci*. 1993;41(3):409-17.
- 206 17. Buhler DD. Influence of tillage systems on weed population dynamics and management in  
207 corn and soybean in the central USA. *Crop Science*. 1995;35(5):1247-58.
- 208 18. Xiao N, Jing B, Ge F, Liu X. The fate of herbicide acetochlor and its toxicity to *Eisenia*  
209 *fetida* under laboratory conditions. *Chemosphere*. 2006;62(8):1366-73.
- 210 19. Roberts BL, Wyman Dorough H. Relative toxicities of chemicals to the earthworm *Eisenia*  
211 *foetida*. *Environmental Toxicology and Chemistry: An International Journal*.  
212 1984;3(1):67-78.
- 213 20. Wang Y, Wu S, Chen L, Wu C, Yu R, Wang Q, et al. Toxicity assessment of 45 pesticides  
214 to the epigeic earthworm *Eisenia fetida*. *Chemosphere*. 2012;88(4):484-91.
- 215 21. Roberts BL, Dorough HW. Relative Toxicities of Chemicals to the Earthworm *Eisenia-*  
216 *Foetida*. *Environmental Toxicology and Chemistry*. 1984;3(1):67-78. doi: Doi

- 217 10.1897/1552-8618(1984)3[67:Rtoctt]2.0.Co;2. PubMed PMID:  
218 WOS:A1984SN99300009.
- 219 22. Butler DW, Verrell PA. Inhibitory effect of a herbicide formulation on toxicity of malathion  
220 to the worm *Eisenia fetida*. *Bull Environ Contam Toxicol*. 2005;75(3):421-8. Epub  
221 2006/01/03. PubMed PMID: 16385945.
- 222 23. Chen J, Saleem M, Wang C, Liang W, Zhang Q. Individual and combined effects of  
223 herbicide tribenuron-methyl and fungicide tebuconazole on soil earthworm *Eisenia*  
224 *fetida*. *Sci Rep*. 2018;8(1):2967. Epub 2018/02/16. doi: 10.1038/s41598-018-21288-  
225 y. PubMed PMID: 29445108; PubMed Central PMCID: PMC5813222.
- 226 24. Wang Y, An X, Shen W, Chen L, Jiang J, Wang Q, et al. Individual and combined toxic  
227 effects of herbicide atrazine and three insecticides on the earthworm, *Eisenia fetida*.  
228 *Ecotoxicology*. 2016;25(5):991-9. Epub 2016/04/14. doi: 10.1007/s10646-016-1656-  
229 4. PubMed PMID: 27068296.
- 230 25. Wang Y, Cang T, Yu R, Wu S, Liu X, Chen C, et al. Joint acute toxicity of the herbicide  
231 butachlor and three insecticides to the terrestrial earthworm, *Eisenia fetida*. *Environ*  
232 *Sci Pollut Res Int*. 2016;23(12):11766-76. Epub 2016/03/08. doi: 10.1007/s11356-  
233 016-6347-4. PubMed PMID: 26946506.
- 234 26. Neuhauser EF, Durkin PR, Malecki MR, Anatra M. Comparative Toxicity of 10 Organic-  
235 Chemicals to 4 Earthworm Species. *Comp Biochem Phys C*. 1986;83(1):197-200.  
236 doi: Doi 10.1016/0742-8413(86)90036-8. PubMed PMID: WOS:A1986A223100034.
- 237 27. Armitage P, Berry G, Matthews JNS. *Statistical methods in medical research*: John Wiley &  
238 Sons; 2008.

- 239 28. R Core Team. 2016. R: A language and environment for statistical computing. v 3.5.1 R  
240 Foundation for for Statistical Computing, Vienna, Austria. URL: [https://www.R-](https://www.R-project.org/)  
241 [project.org/](https://www.R-project.org/). 2018.
- 242 29. Therneau TM. A package for survival analysis in S. 2015. Version 2.38. 2015.
- 243 30. Therneau TM, Grambsch PM. Modeling survival data extending the cox model. 2000.
- 244 31. Roberts BL, Dorough HW. Hazards of Chemicals to Earthworms. Environmental  
245 Toxicology and Chemistry. 1985;4(3):307-23. doi: Doi 10.1897/1552-  
246 8618(1985)4[307:Hocte]2.0.Co;2. PubMed PMID: WOS:A1985AJW1600006.
- 247 32. Verrell P, Van Buskirk E. As the worm turns: Eisenia fetida avoids soil contaminated by a  
248 glyphosate-based herbicide. B Environ Contam Tox. 2004;72(2):219-24. doi:  
249 10.1007/s00128-003-9134-0. PubMed PMID: WOS:000188531100001.
- 250 33. Hattab S, Boughattas I, Boussetta H, Viarengo A, Banni M, Sforzini S. Transcriptional  
251 expression levels and biochemical markers of oxidative stress in the earthworm  
252 Eisenia andrei after exposure to 2,4-dichlorophenoxyacetic acid (2,4-D). Ecotoxicol  
253 Environ Saf. 2015;122:76-82. Epub 2015/07/27. doi: 10.1016/j.ecoenv.2015.07.014.  
254 PubMed PMID: 26210610.
- 255 34. Nebeker AV, Schuytema GS. Chronic effects of the herbicide diuron on freshwater  
256 cladocerans, amphipods, midges, minnows, worms, and snails. Arch Environ Con  
257 Tox. 1998;35(3):441-6. doi: DOI 10.1007/s002449900400. PubMed PMID:  
258 WOS:000075722400012.
- 259 35. Mosleh YY, Paris-Palacios S, Couderchet M, Biagianni-Risbourg S, Vernet G. Effects of the  
260 herbicide isoproturon on metallothioneins, growth, and antioxidative Defenses in the

261 aquatic worm *Tubifex tubifex* (Oligochaeta, Tubificidae). *Ecotoxicology*.  
262 2005;14(5):559-71. PubMed PMID: WOS:000231908500006.  
263 36. Brühl CA, Schmidt T, Pieper S, Alscher A. Terrestrial pesticide exposure of amphibians: An  
264 underestimated cause of global decline? *Scientific Reports*. 2013;3:1135. doi:  
265 10.1038/srep01135.  
266

267 **Supporting information**

268 **S1 Data**

269 **S2 R code**

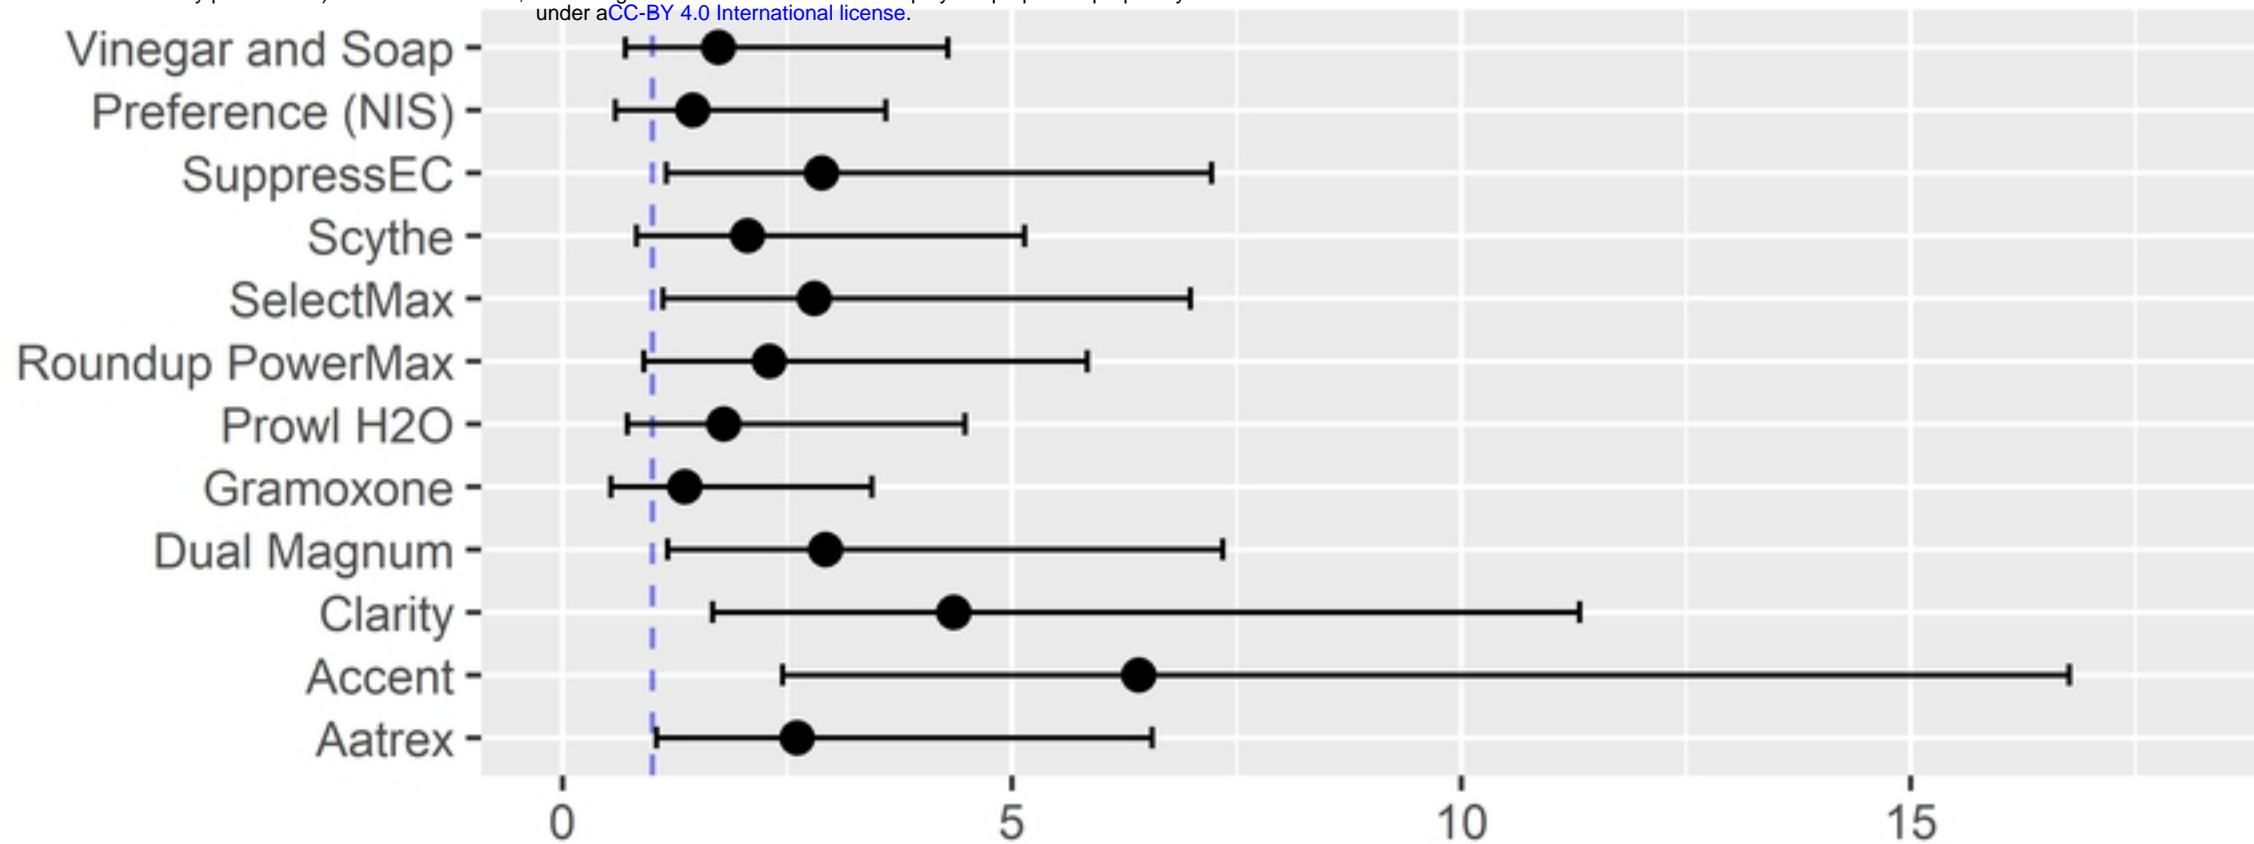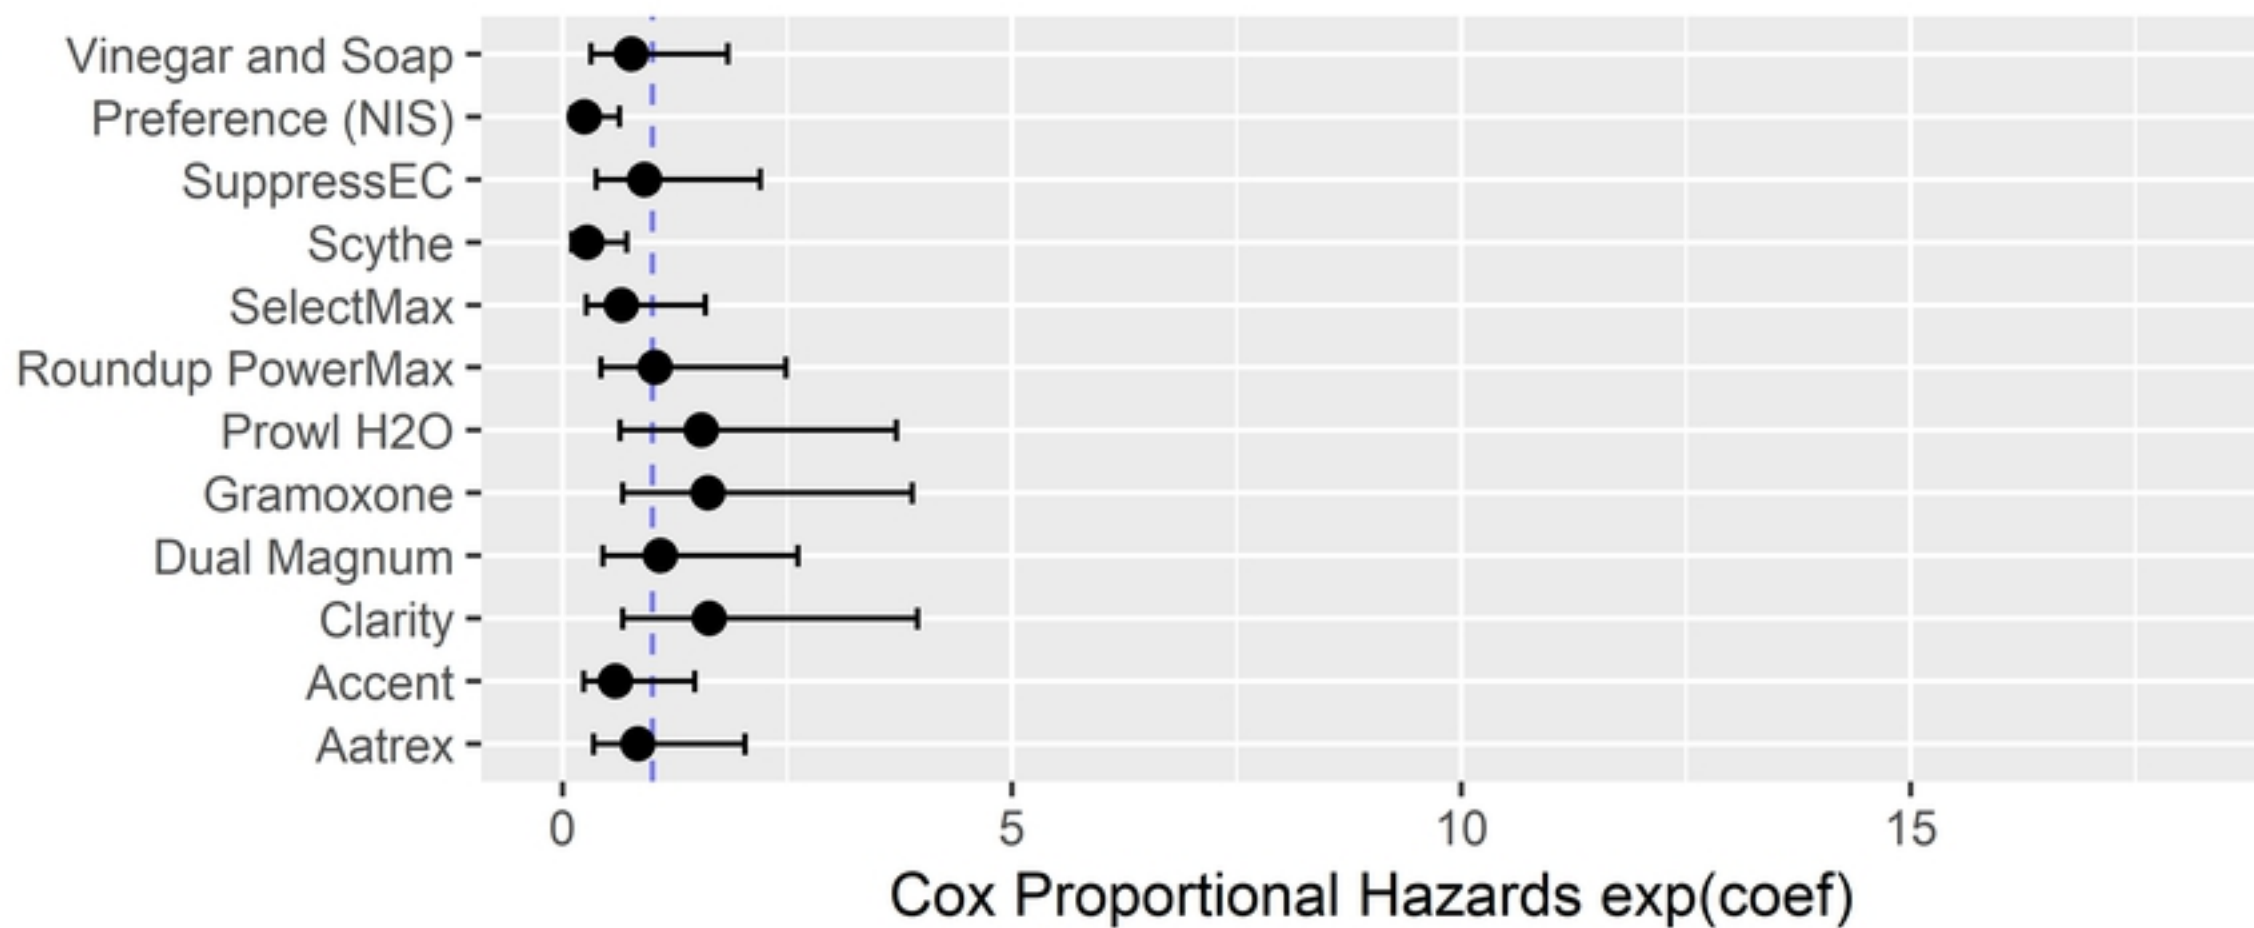

Figure 1



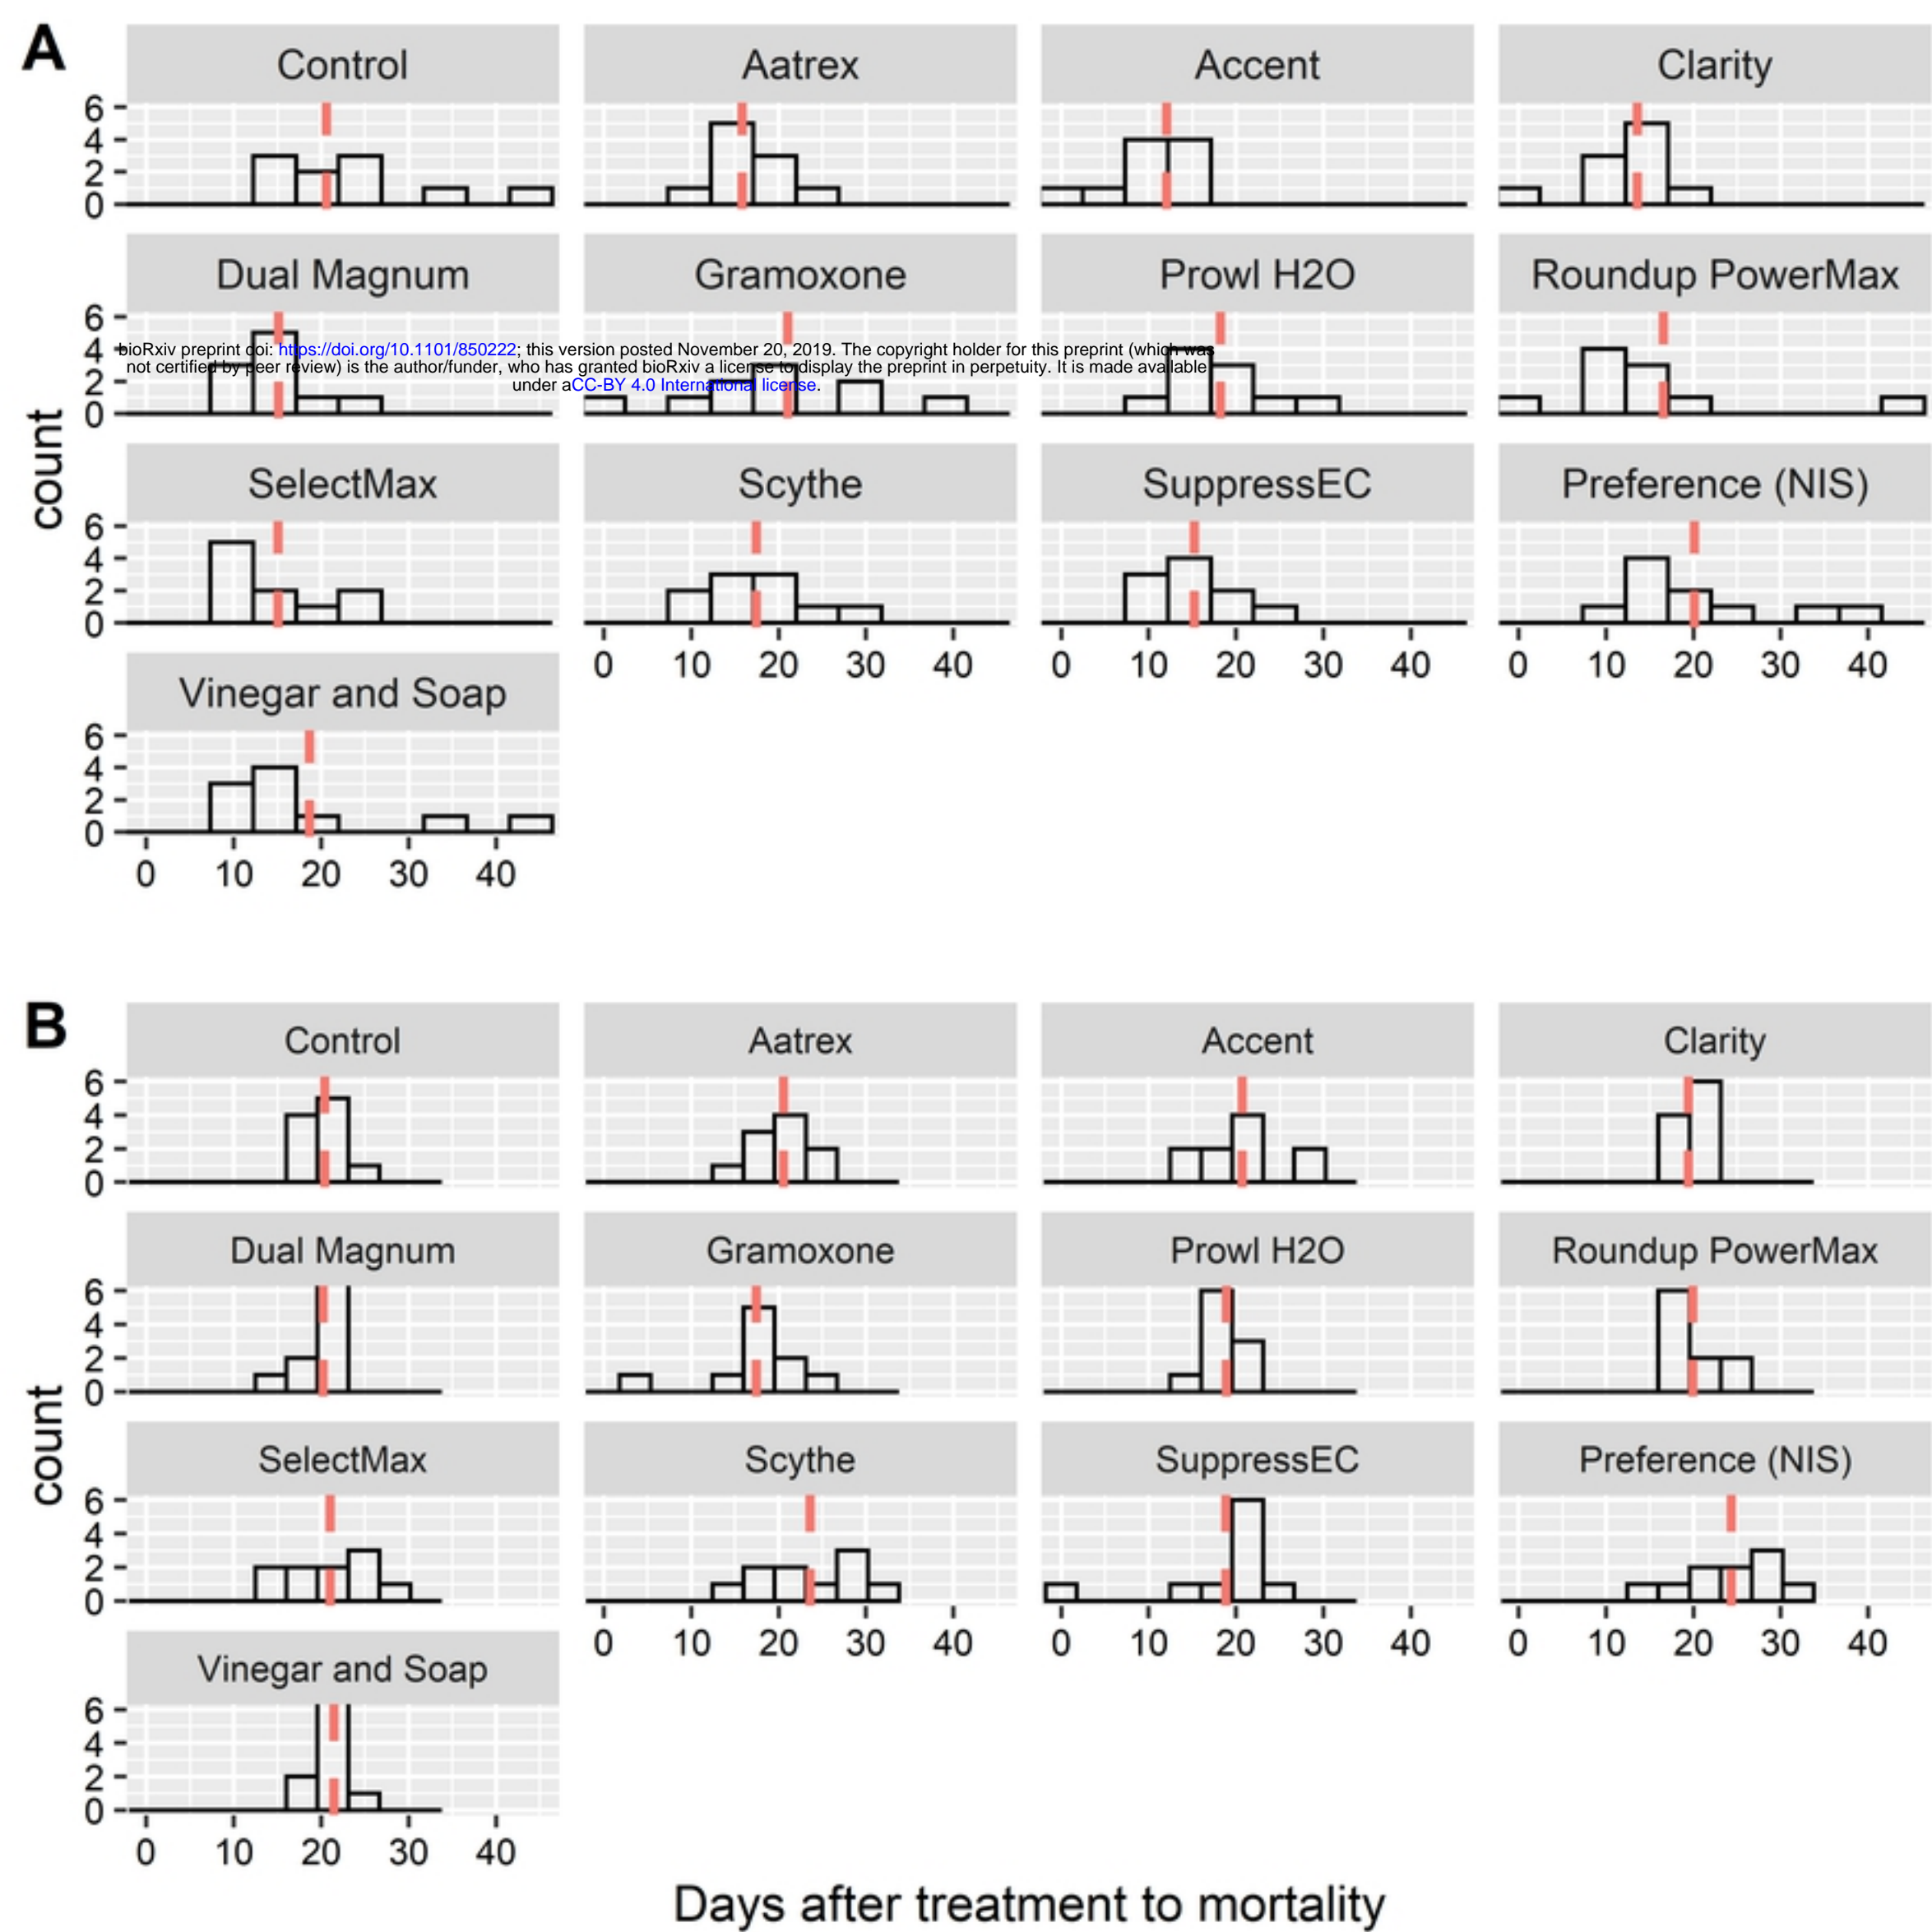

Figure 2
